# Supplementary material
Source: publisher figshare collection journal article supplement (https://sage.figshare.com/ndownloader/files/15017270)
Supplement: Supplementary file 1 [file 15017270]

| <b>No.</b> | <b>Country</b> | <b>Company</b>                       | <b>Description</b>                                                                                                                          | <b>Interviewee(s)</b>               | <b>Position(s)</b>                                          |
|------------|----------------|--------------------------------------|---------------------------------------------------------------------------------------------------------------------------------------------|-------------------------------------|-------------------------------------------------------------|
| 1          | AT             | ORF-Enterprise                       | International content sales for Austrian TV market leader ORF                                                                               | Beatrix Cox-Riesenfelder            | CFO                                                         |
| 2          | AT             | Mediaprint                           | Largest publisher in Austria                                                                                                                | Thomas Kralinger / Matthias Hranyai | CEO / Assistant to CEO                                      |
| 3          | AT             | Austria Presse Agentur (APA)         | Leading news agency in Austria                                                                                                              | Clemens Pig                         | CEO                                                         |
| 4          | CH             | Diogenes Verlag                      | Publisher of fiction books from German-language and international authors                                                                   | Stephan Fritsch                     | Managing Director                                           |
| 5          | DE             | Axel Springer                        | Leading digital publisher in Europe, multimedia                                                                                             | Ralph Büchi                         | President International                                     |
| 6          | DE             | Vogel Business Media                 | Publisher of trade publications in 16 countries                                                                                             | Gunther Schunk / Dieter Wendel      | CCO / M&A Manager                                           |
| 7          | DE             | ZDF Enterprises                      | International TV-rights trading and co-production with German Public service Media (PSM) as most important customer                         | Fred Burcksen / Stephan Adrian      | Managing Directors                                          |
| 8          | CH             | Highlight Communication              | Holding company with subsidiaries in film- and sports licensing                                                                             | Bernhard Burgener                   | President                                                   |
| 9          | CH             | Tamedia                              | Leading Swiss media group, publishing and digital platforms                                                                                 | Marcel Kohler                       | Managing Director                                           |
| 10         | DE             | DPA                                  | Leading German news agency                                                                                                                  | Michael Segbers                     | CEO                                                         |
| 11         | DE             | Studio Hamburg Group                 | One of the German leading production and service centers for film and television                                                            | Johannes Züll                       | Senior Managing Director                                    |
| 12         | DE             | Bertelsmann SE & Co. KGaA            | Diversified media, services and education company including, inter alia, the broadcaster RTL Group and the magazine publisher Gruner + Jahr | Shobhna Mohn                        | Executive Vice President Growth Regions                     |
| 13         | DE             | Motor Presse Stuttgart GmbH & Co. KG | Publisher of special interest (especially automotive)                                                                                       | Dr. Volker Breid                    | CEO                                                         |
| 14         | ESP            | Grupo PRISA                          | Describes itself as “the world’s leading Spanish and Portuguese-language media group”                                                       | Barbara Manrique de Lara            | Corporate Communications & Foreign Affairs Director         |
| 15         | UK             | Reed Elsevier PLC                    | Scientific publishing database & analytics provider                                                                                         | Dr. Mark Siebert                    | Director Engagement Programs & Strategy                     |
| 16         | UK             | ITV Studios Limited                  | Large TV-production and distribution company                                                                                                | Ella Umansky                        | Senior manager in International Formats                     |
| 17         | European       | European Broadcasting Union          | Alliance of PSM in Europe and beyond providing technical services and sports licenses                                                       | Ingrid Deltenre                     | General Secretary                                           |
| 18         | USA            | Thomson Reuters                      | Provides expert information in finance, economics and law & owns the Reuters news agency                                                    | Gonzalo Lissarague                  | President Global Growth Organisation                        |
| 19         | USA            | Story House Media Group              | Produces primarily non-fictional TV content in the US and Germany                                                                           | Andreas Gutzeit                     | Chief Creative Officer                                      |
| 20         | USA            | Time Warner Inc.                     | Company focusing on TV, TV networks, film and TV entertainment                                                                              | Manuel Urrutia                      | Senior Vice President, International and Corporate Strategy |

|    |     |                                              |                                                                                                               |                     |                                                                  |
|----|-----|----------------------------------------------|---------------------------------------------------------------------------------------------------------------|---------------------|------------------------------------------------------------------|
| 21 | USA | Tribune Content Agency (TCA; Teil von tronc) | Distributes the print content provided by tronc newspapers and others                                         | Wayne Lown          | International Sales Director                                     |
| 22 | USA | Time Inc.                                    | Multi-platform media company coming sourcing from its magazine brands                                         | Steve Marcopoto     | President, Time Inc. International                               |
| 23 | USA | Discovery Networks International             | Distributing cable networks as wells as pay- and free TV channels worldwide and providing TV content          | Jennifer Marburg    | Vice President of Consumer Program Publicity                     |
| 24 | NL  | De Persgroep                                 | Multi-media company, focus on newspapers and magazines                                                        | Piet Vroman         | CFO                                                              |
| 25 | DE  | Hubert Burda Media                           | International multi-media company                                                                             | Eckart Bollmann     | CEO of Burda International                                       |
| 26 | UK  | Time Inc. UK                                 | Content-Trader, Multi-Platform Media and Related Business Corporation                                         | Marcus Rich         | CEO                                                              |
| 27 | ESP | Grupo Secuoya                                | Largest independent audiovisual group in the Spanish market, content creation, production and Distribution    | José Miguel Barrera | Head of International Division                                   |
| 28 | D   | Turner Broadcasting System Deutschland GmbH  | US-based media company, international formats of Turner media brands                                          | Hannes Heyelmann    | SVP, Managing Director, CEE & International Programming Strategy |
| 29 | UK  | Reuters                                      | B2B distribution of text, audio and video to news and media organisations, analytics, part of Thomson Reuters | Claudia Palmer      | Chief Financial Officer & Chief Commercial Officer               |
| 30 | USA | Associated Press                             | Global news agency                                                                                            | Daisy Veerasingham  | Senior Vice President Revenue International                      |
| 31 | USA | PBS Distribution                             | Video distribution for US-television network PBS                                                              | Tom Koch            | Vice President, PBS Distribution                                 |
| 32 | NL  | Wolters Kluwer                               | Scientific publishing database & analytics provider                                                           | Corinne Saunders    | CEO Developing and Emerging Markets                              |
| 33 | CN  | Tencent                                      | Multi media group, games, social networking and news                                                          | Jonathan He         | Managing Director Products and Technologies                      |
| 34 | CN  | Yue Cheng Media                              | Virtual reality provider                                                                                      | Bin Gu              | CEO                                                              |
